# Supplementary material
Source: HighWire-hosted journal article supplement (https://oem.bmj.com/content/76/6/370)
Supplement: inline-supplementary-material-1 [file inline-supplementary-material-1.pdf]

Table S1: Odds ratios (ORs) for first acute myocardial infarction by potential risk factors

| Potential risk factors   | Entire database<br>OR (95% CI) |              | Late birth cohorts<br>OR (95% CI) |               | Late birth cohorts,<br>sub-cohort A only<br>OR (95% CI) |               |
|--------------------------|--------------------------------|--------------|-----------------------------------|---------------|---------------------------------------------------------|---------------|
| Last smoking status      |                                |              |                                   |               |                                                         |               |
| Never                    | 1.00                           | (referent)   | 1.00                              | (referent)    | 1.00                                                    | (referent)    |
| Former                   | 3.74                           | 2.04 to 6.84 | 4.31                              | 1.43 to 13.02 | 3.27                                                    | 0.45 to 23.59 |
| Current                  | 5.31                           | 3.17 to 8.89 | 8.16                              | 3.17 to 21.01 | 12.07                                                   | 2.37 to 61.44 |
| Unknown                  | 0.92                           | 0.44 to 1.95 | 0.63                              | 0.12 to 3.31  | 0.95                                                    | 0.08 to 11.87 |
| Diabetes mellitus*       |                                |              |                                   |               |                                                         |               |
| No                       | 1.00                           | (referent)   | 1.00                              | (referent)    | 1.00                                                    | (referent)    |
| Yes                      | 5.60                           | 2.93 to 10.7 | 4.91                              | 1.92 to 12.51 | 5.58                                                    | 1.67 to 18.67 |
| Hypertension*            |                                |              |                                   |               |                                                         |               |
| No                       | 1.00                           | (referent)   | 1.00                              | (referent)    | 1.00                                                    | (referent)    |
| Yes                      | 1.88                           | 1.38 to 2.57 | 1.71                              | 1.05 to 2.78  | 1.75                                                    | 0.86 to 3.54  |
| Hypercholesterolemia*    |                                |              |                                   |               |                                                         |               |
| No                       | 1.00                           | (referent)   | 1.00                              | (referent)    | 1.00                                                    | (referent)    |
| Yes                      | 3.87                           | 1.82 to 8.20 | 7.80                              | 2.78 to 21.88 | 2.40                                                    | 0.64 to 8.93  |
| Obesity*                 |                                |              |                                   |               |                                                         |               |
| No                       | 1.00                           | (referent)   | 1.00                              | (referent)    | 1.00                                                    | (referent)    |
| Yes                      | 1.14                           | 0.75 to 1.72 | 1.56                              | 0.87 to 2.78  | 1.86                                                    | 0.81 to 4.29  |
| ESR elevated at baseline |                                |              |                                   |               |                                                         |               |
| No                       | 1.00                           | (referent)   | 1.00                              | (referent)    | 1.00                                                    | (referent)    |
| Yes                      | 1.83                           | 1.30 to 2.57 | 2.26                              | 1.23 to 4.14  | 1.65                                                    | 0.76 to 3.59  |
| Metabolic syndrome*      |                                |              |                                   |               |                                                         |               |
| No                       | 1.00                           | (referent)   | 1.00                              | (referent)    | 1.00                                                    | (referent)    |
| Yes                      | 4.09                           | 1.81 to 9.24 | 3.88                              | 1.22 to 12.35 | 2.25                                                    | 0.50 to 10.05 |

\* Ascertained 5 years prior to the index date

Table S2: Odds ratios (ORs) for first acute myocardial infarction by potential risk factors, calculated without time lag

| <b>Potential risk factors</b> | <b>Entire database<br/>OR (95% CI)</b> |              | <b>Late birth cohorts<br/>OR (95% CI)</b> |              | <b>Late birth cohorts,<br/>sub-cohort A only<br/>OR (95% CI)</b> |              |
|-------------------------------|----------------------------------------|--------------|-------------------------------------------|--------------|------------------------------------------------------------------|--------------|
| Diabetes mellitus             |                                        |              |                                           |              |                                                                  |              |
| No                            | 1.00                                   | (referent)   | 1.00                                      | (referent)   | 1.00                                                             | (referent)   |
| Yes                           | 4.52                                   | 2.65 to 7.71 | 4.21                                      | 1.80 to 9.85 | 4.30                                                             | 1.38 to 13.4 |
| Hypertension                  |                                        |              |                                           |              |                                                                  |              |
| No                            | 1.00                                   | (referent)   | 1.00                                      | (referent)   | 1.00                                                             | (referent)   |
| Yes                           | 2.36                                   | 1.75 to 3.18 | 2.71                                      | 1.66 to 4.41 | 2.06                                                             | 1.02 to 4.17 |
| Hypercholesterolemia          |                                        |              |                                           |              |                                                                  |              |
| No                            | 1.00                                   | (referent)   | 1.00                                      | (referent)   | 1.00                                                             | (referent)   |
| Yes                           | 6.84                                   | 4.11 to 11.4 | 6.33                                      | 3.20 to 12.5 | 4.19                                                             | 1.50 to 11.7 |
| Obesity                       |                                        |              |                                           |              |                                                                  |              |
| No                            | 1.00                                   | (referent)   | 1.00                                      | (referent)   | 1.00                                                             | (referent)   |
| Yes                           | 1.22                                   | 0.85 to 1.73 | 1.32                                      | 0.79 to 2.23 | 1.34                                                             | 0.61 to 2.92 |
| Metabolic syndrome            |                                        |              |                                           |              |                                                                  |              |
| No                            | 1.00                                   | (referent)   | 1.00                                      | (referent)   | 1.00                                                             | (referent)   |
| Yes                           | 5.41                                   | 2.83 to 10.3 | 3.53                                      | 1.41 to 8.81 | 1.85                                                             | 0.55 to 6.28 |
